# Supplementary material
Source: Springer Nature journal article supplement (https://www.springerprofessional.de/resource/supplementary/13638_2012_370_MOESM10_ESM.pdf/11897500)

Seven-dimensional PIR  
Sensor Signal Stream

*STE* computation  
and Segmentation

Horizontal  
activity?

Yes

Walking/  
Jogging

No

Falling?

Yes

Falling

No

Sitting down/  
Standing up from a chair

First layer  
HMMs

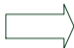

Second  
layer HMMs

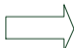

Supplement: MOESM10 [file 11897500]
